# Supplementary material
Source: PubMed Central journal article supplement (PMC8887595)
Supplement: NIHMS1781395-supplement-Extended_Data_Figures.pdf [file NIHMS1781395-supplement-Extended_Data_Figures.pdf]

# Suppl. Fig. 1

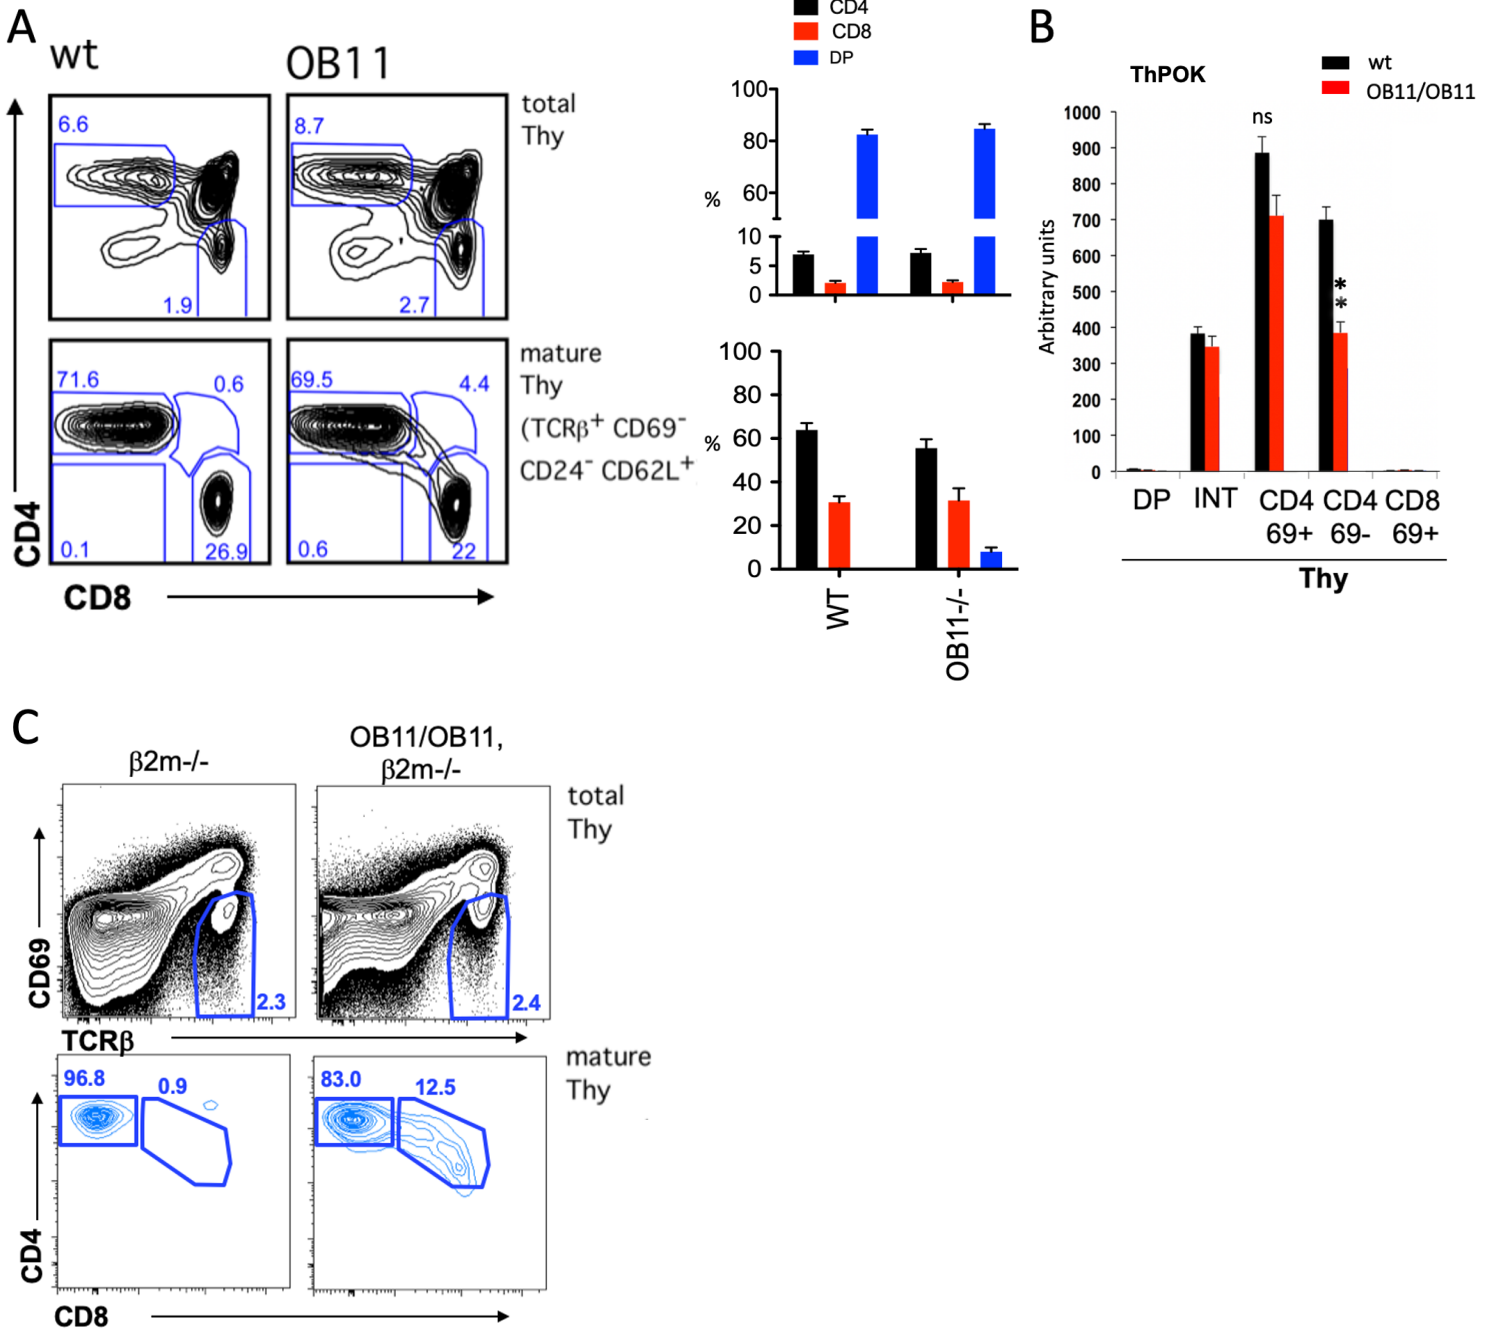

# Suppl. Fig. 2

**A**

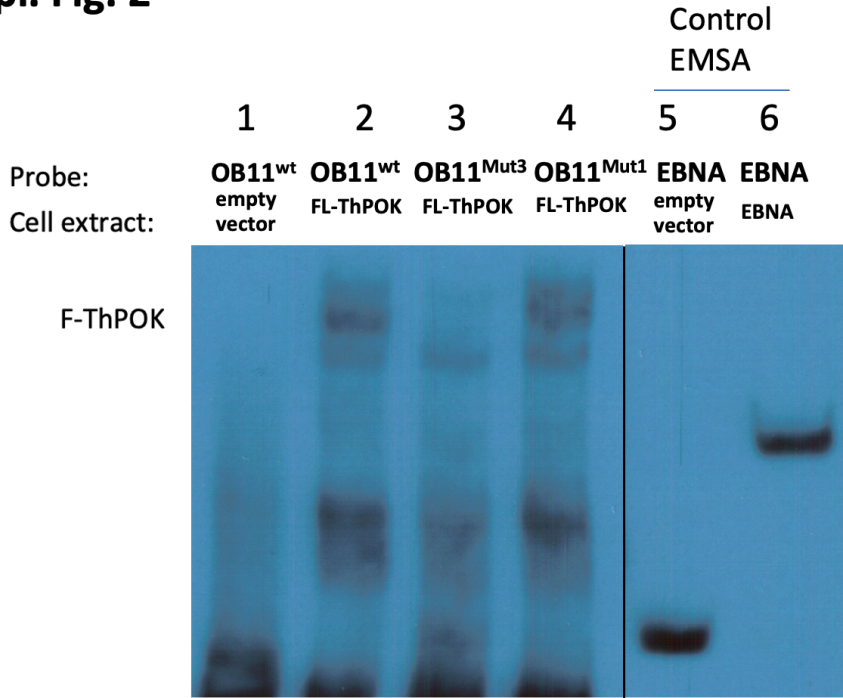

**B**

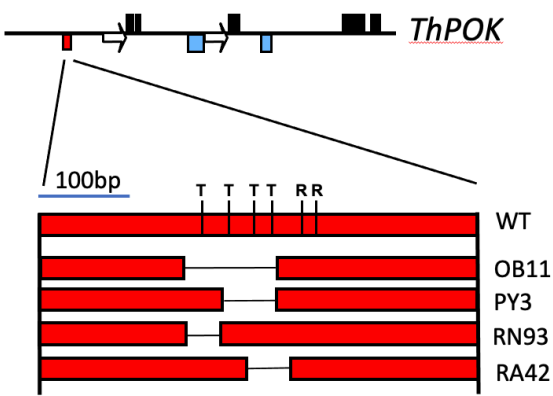

**C**

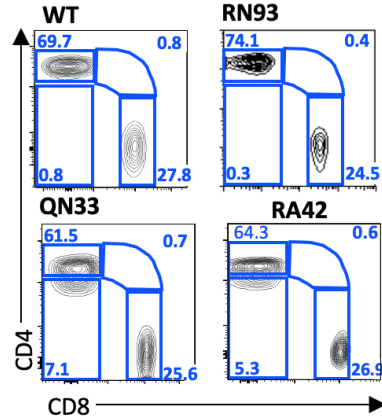

**D**

|            | Site 1                | Site 2      | Site 3                | Site 4                            |                        |                    |
|------------|-----------------------|-------------|-----------------------|-----------------------------------|------------------------|--------------------|
| GCTACCCGCA | GGTGTGGGGG GTAGTCGGC  | GGAGGGGG.TA | CCCTTGGCAG CCACCGCCTC | TTCAGGTGGG TTGGCGGTC GCGGTAGGGG   | TTCTGGGGGG CGGCGGGAGG  | WT (mouse)         |
| GCCACCCGCA | GGTGTGGGG GgAGTCGGC   | GGAGGGGGTA  | CCCcTGGCAG CCACCGCCcC | TTCAGGTGGG TTGGCGGTC GCGGTgGGGG   | cqCTGGGGGG CGGgGGGgGt  | WT (human)         |
| GCTACCCGCA | GGTGTaaGGa aTAGTCGGCa | aGAGaaaG.TA | CCCTTGGCAG CCACCGCCTC | TTCAGGTGGG TTaaGcaTC GCGGTAGGGG   | TTCTGGGGGG CGGCGGGAGG  | Mut <sup>1+3</sup> |
| GCTACCCGCA | GGTGTaaGGa aTAGTCGGC  | aGAGaaaG.TA | CCCTTGGCAG CCACCGCCTC | TTCAGGTGGG TTGGCGGTC GCGGTAGGGG   | TTCTGGGGGG CGGCGGGAGG  | Mut <sup>1</sup>   |
| GCTACCCGCA | GGTGTGGGGG GTAGTCGGC  | GGAGGGGG.TA | CCCTTGGCAG CCACCGCCTC | TTCAGGTGGG TTaaGcaTC GCGGTAGGGG   | TTCTGGGGGG CGGCGGGAGG  | Mut <sup>3</sup>   |
| GCTACCCGCA | GGTGTGGGGG GTAGTCGGC  | GGAGGGGGT.A | CCCTTc-----           | -----                             | -----GGG CGGCGGGAGG    | PY3                |
| -----      | -----                 | -----       | -----GGCAG CCACCGCCTC | TTCAGGTGGG TTGGCGGTC GCGGTAGGGG   | TTCTGGGGGG CGGCGGGAGG  | RN93               |
| GCTACCCGCA | GGTGTGGGGG GTAGTCGGC  | GGAGGGGG.TA | CCCTTGGCAG CCACCGCCTC | TTCAGGTGGG TT-----                | -----                  | RA42               |
| GCTACCCGCA | GGTGTaaaaa GTAGTCaaCa | aaAGGGGG.TA | CCCTTGGCAG CCACCGCCTC | TTCAGGTGGG TTaaaaCaaTC GCGGTAGGGG | TTCTaaaaaa CaaCaaaaAaa | QN33               |

### Suppl. Fig. 3

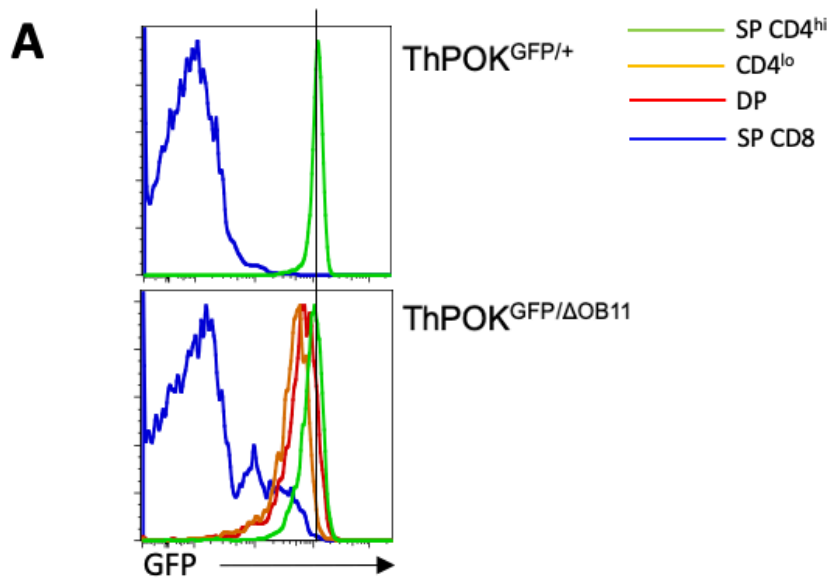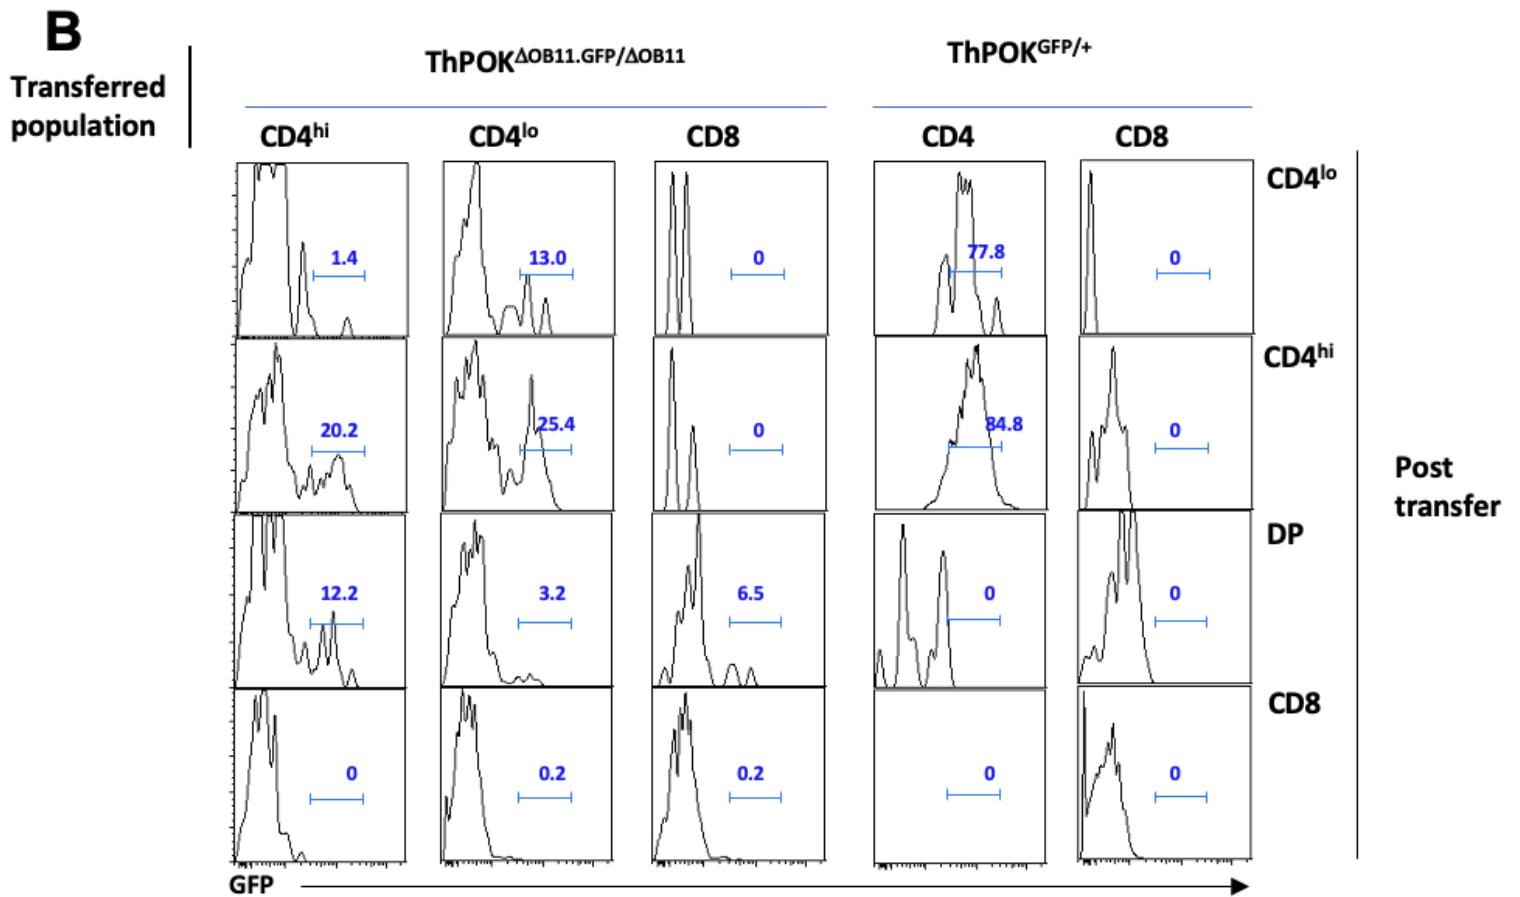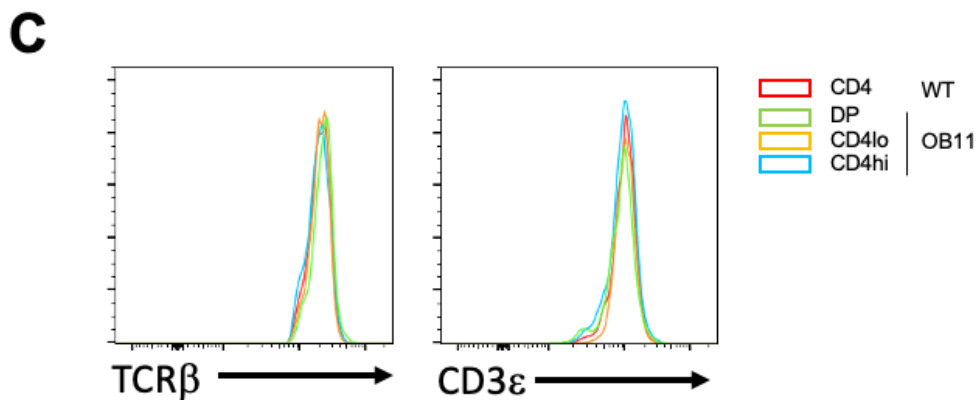

# Suppl. Fig. 4

## A

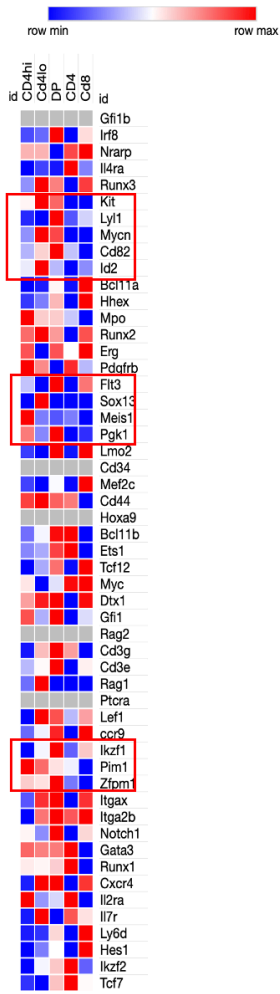

## B

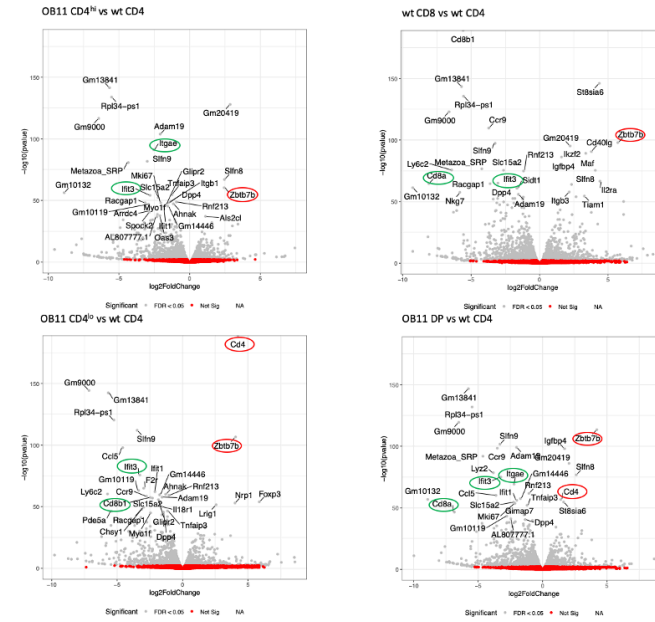

## C

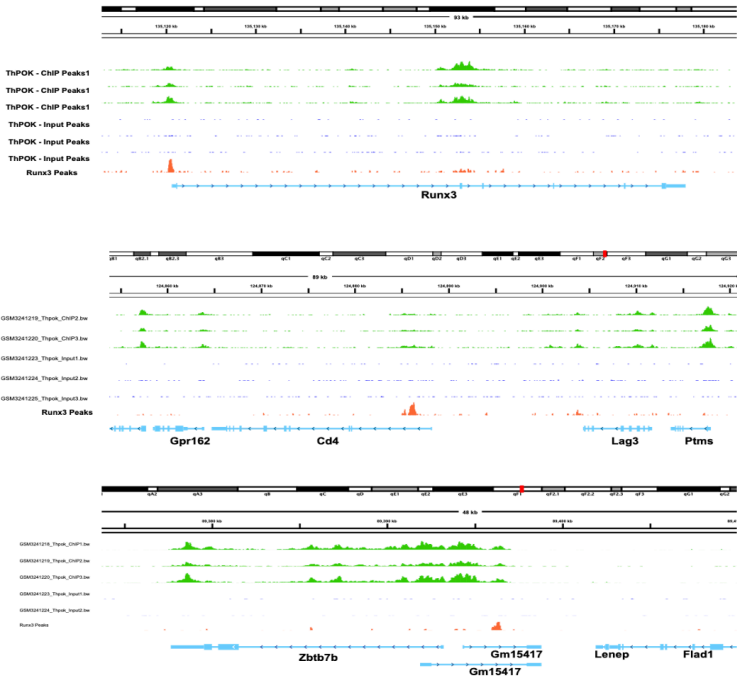

## D

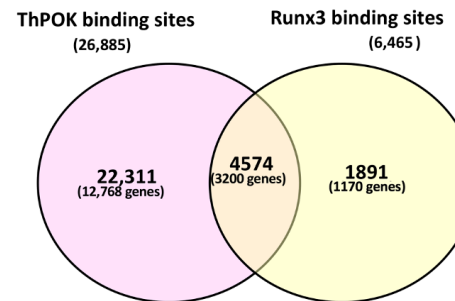

# Suppl. Fig 5

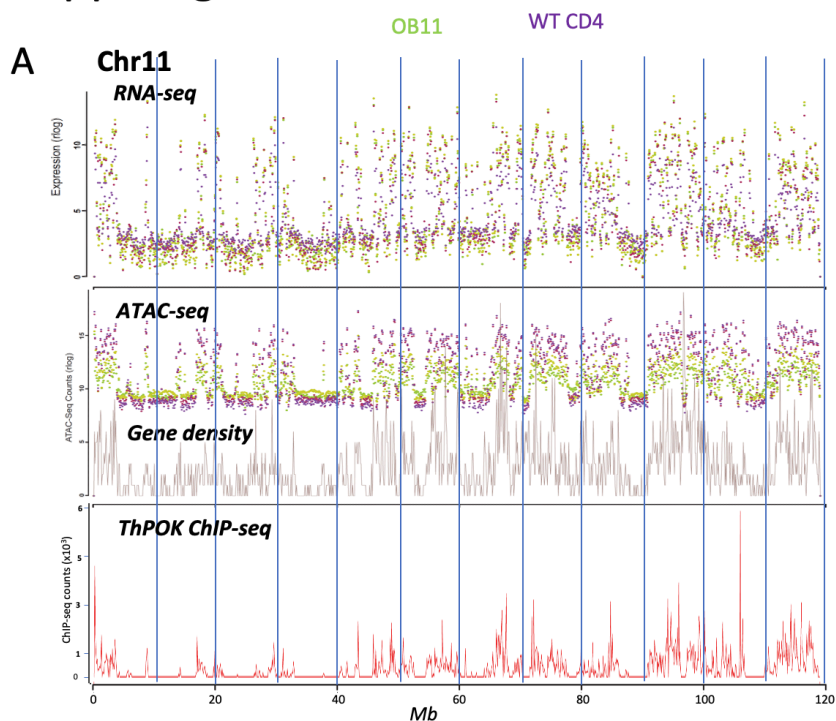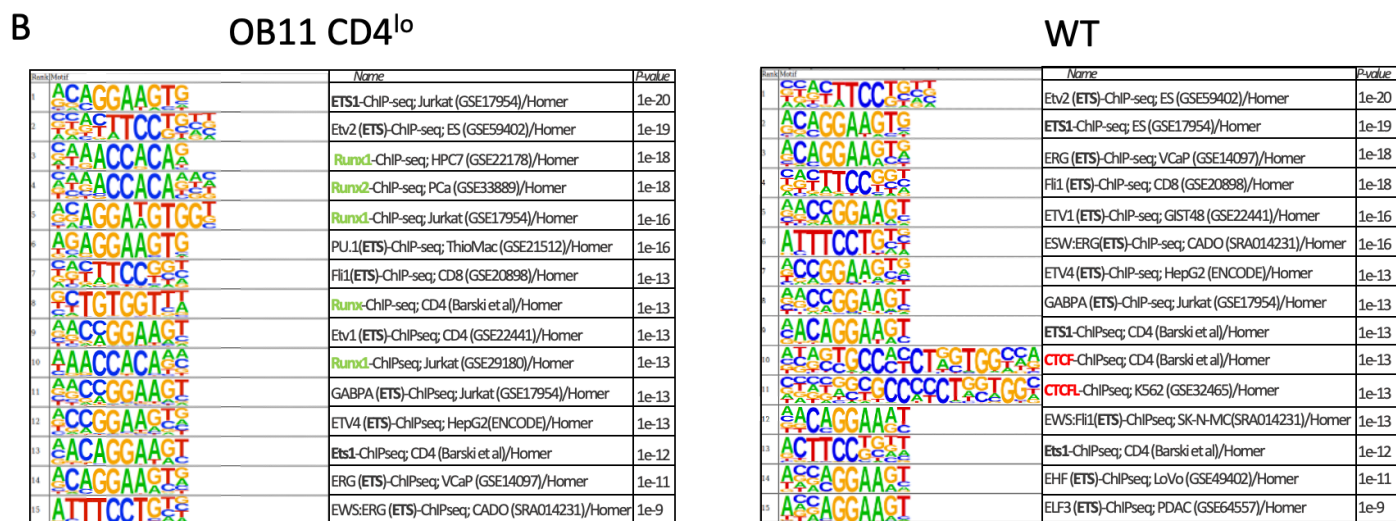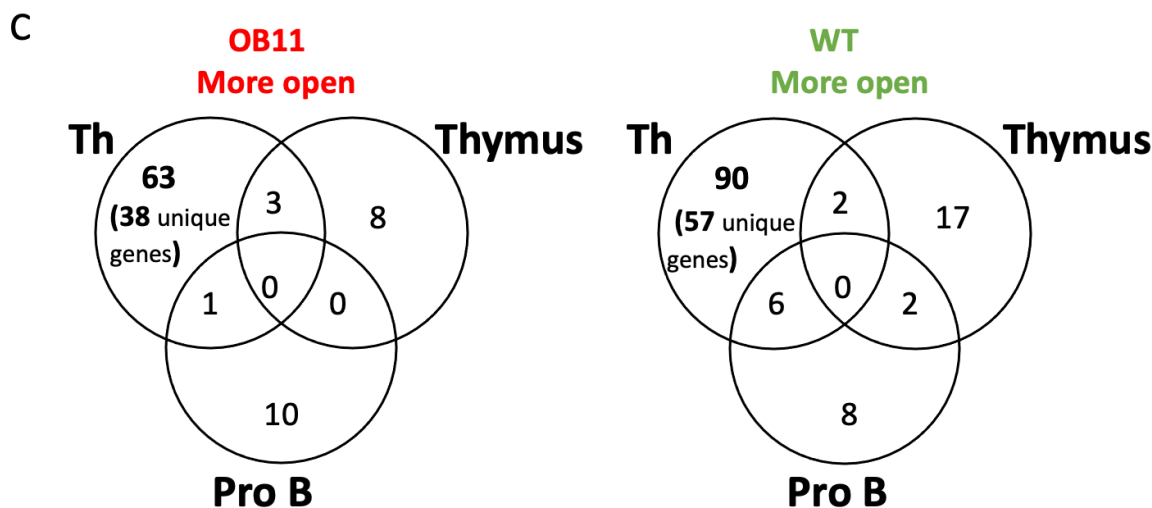

# Suppl. Fig. 6

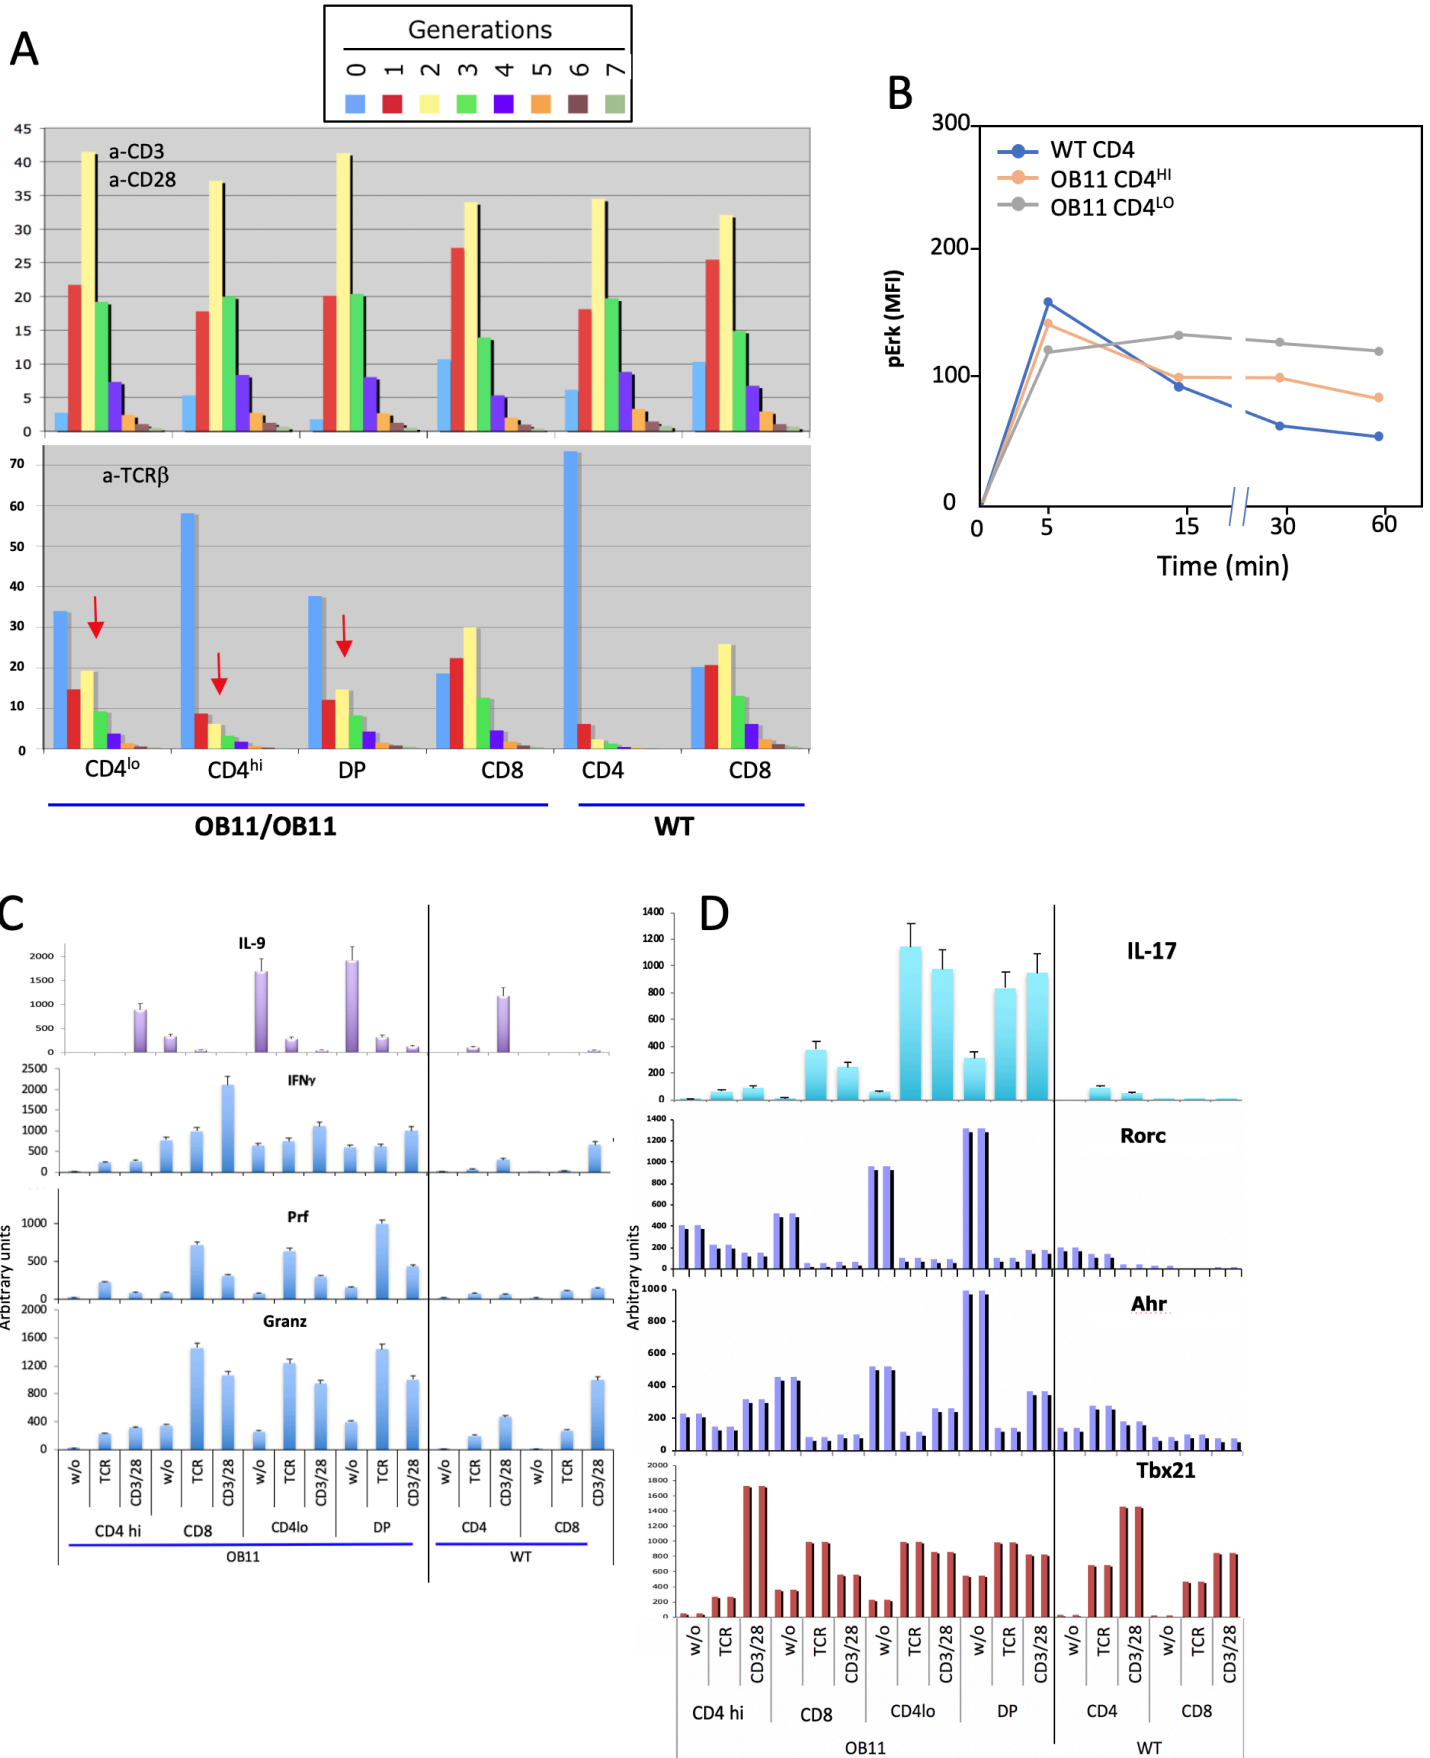

# Suppl. Fig. 6

## E

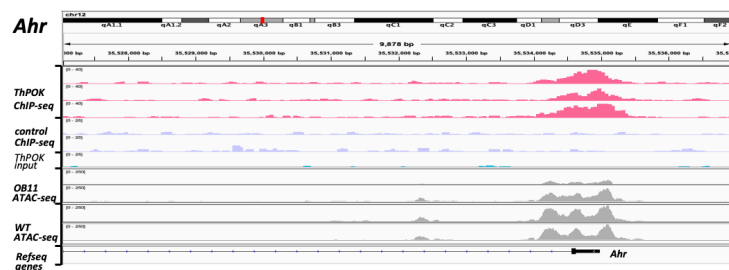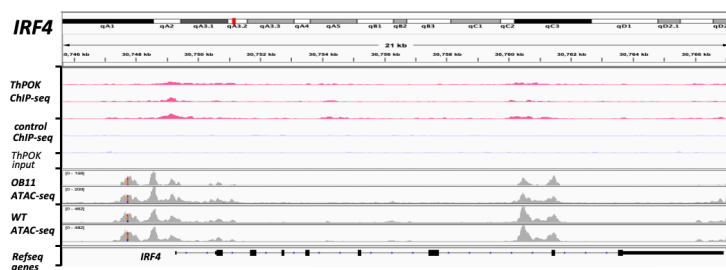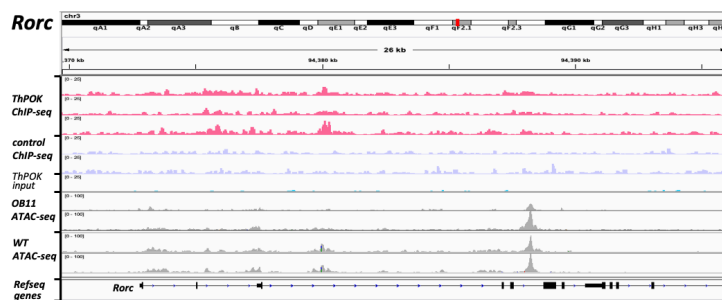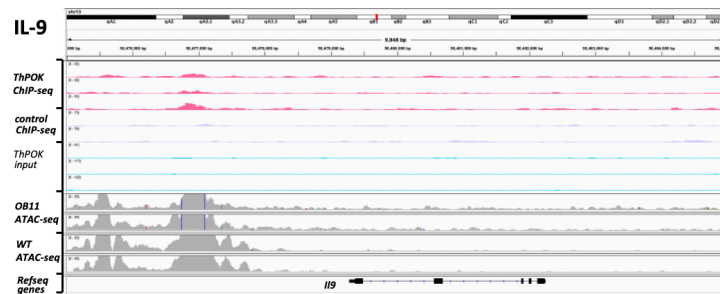

Suppl. Fig.7

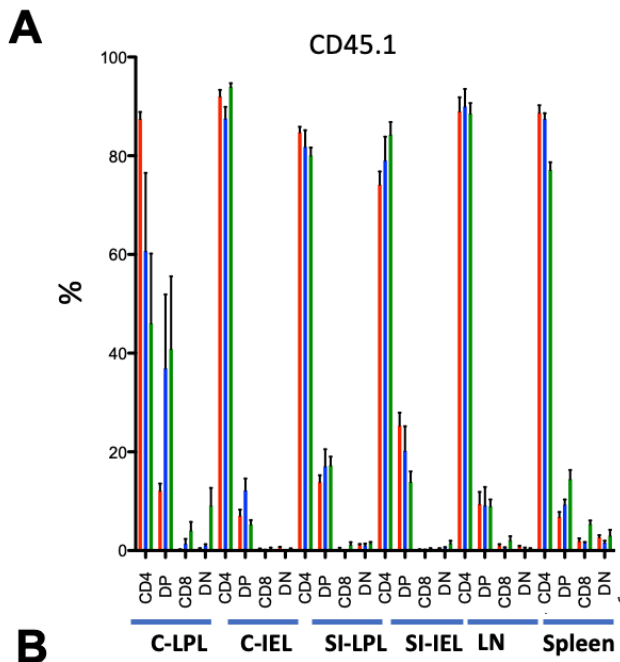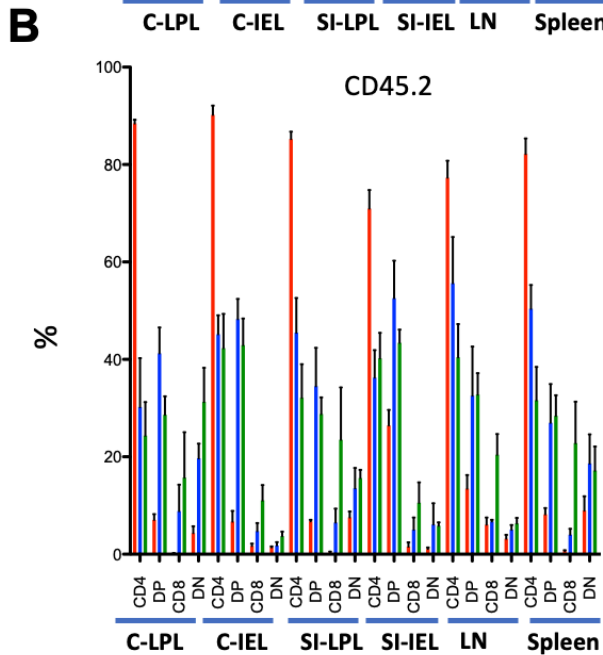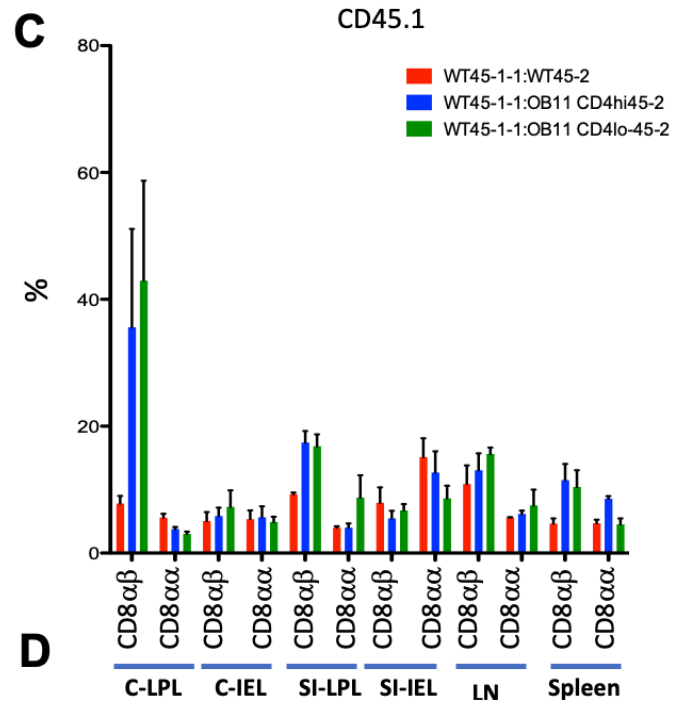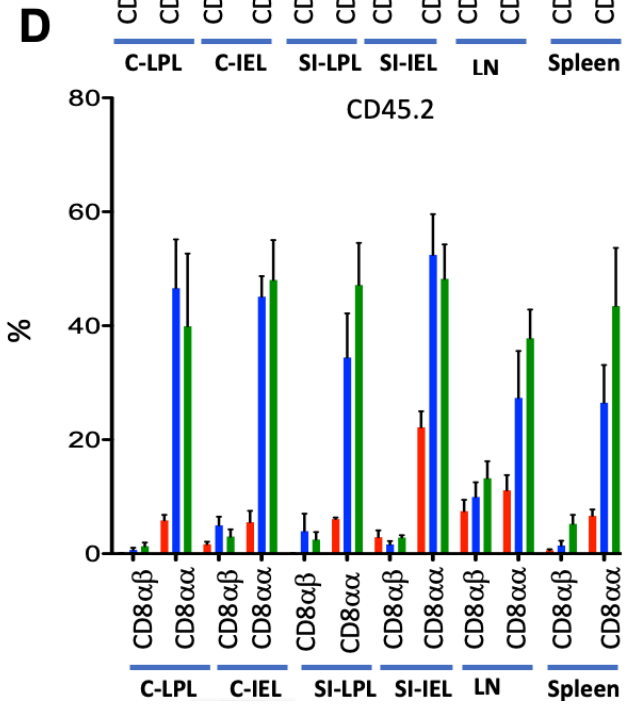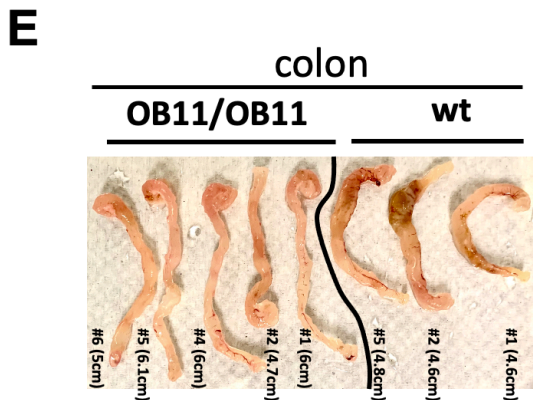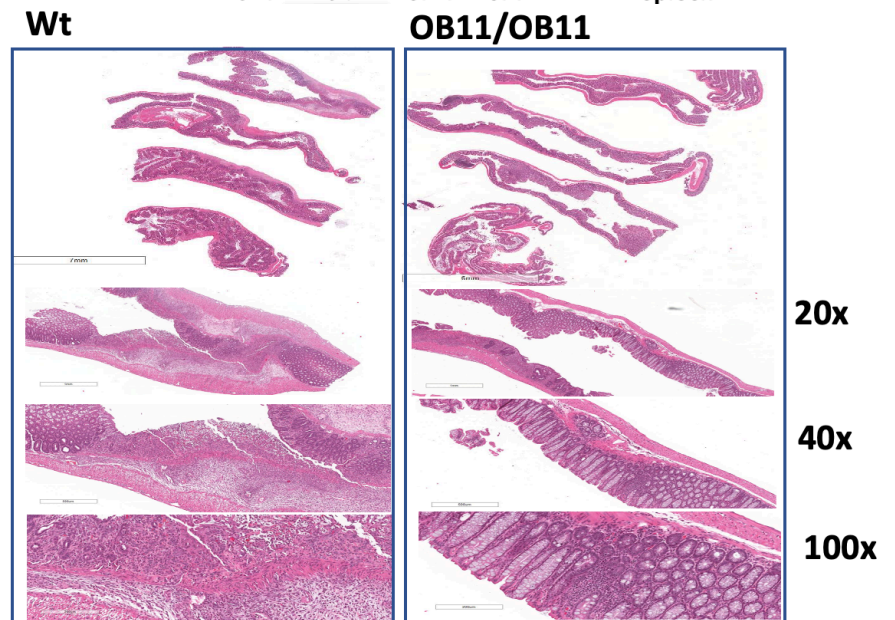



Suppl. Fig.7

**F**

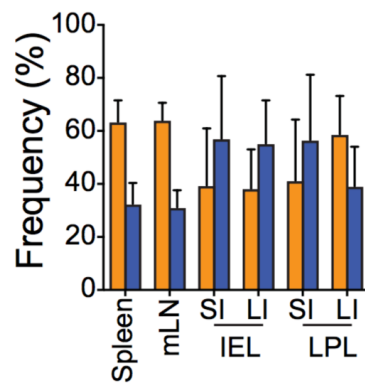

# Suppl. Table 1a

76 genes bound by ThPOK + Runx3, DN in all OB11 subsets

|                 |           |
|-----------------|-----------|
| Akna            | Pag1      |
| Amigo2          | Phf1      |
| Arhgef1         | Polg      |
| Arid3b          | Prkd2     |
| Armc8           | Ptpn7     |
| Atp1b1          | Ptpra     |
| Bbc3            | Pura      |
| Camk2d          | Rab27a    |
| Ccdc21 (=Cep85) | Rapgef6   |
| Ccr7            | Rasa1     |
| Cd27            | Rasa3     |
| Cd2ap           | Rasgrp1   |
| Cdk2            | Rassf2    |
| Celf1           | Rbm38     |
| Cflar           | Rgs14     |
| Chd3            | Rock1     |
| Cnst            | Sav1      |
| Dock4           | Sfpq      |
| Dopey1          | Skil      |
| Dusp7           | Slc44a1   |
| Edem1           | Smc6      |
| Enc1            | Srpk1     |
| Erc1            | Ssbp2     |
| Fam3c           | St6gal1   |
| Gramd1a         | St8sia4   |
| Hjurp           | Tes       |
| Iqgap2          | Tigit     |
| Kcnn4           | Tmcc1     |
| Kidins220       | Tnfaip812 |
| Klhl3           | Trim24    |
| Mat2a           | Tspan32   |
| Mlit3           | Vamp1     |
| Mob3c           | Vps13d    |
| Mpp7            | Zbtb20    |
| Msl1            | Zbtb37    |
| Mum1            | Znrf1     |
| Myo10           |           |
| Naa16           |           |
| Nrip1           |           |
| Oxct1           |           |

136 genes bound by ThPOK +Runx3, UP in all OB11 subsets

|               |          |         |         |
|---------------|----------|---------|---------|
| 2410006H16Rik | Daxx     | Naca    | Topbp1  |
| 2700089E24Rik | Dazap2   | Ndc80   | Tpx2    |
| 5430417L22Rik | Dennd4a  | Ndufa10 | Tra2b   |
| Actr2         | Dnajb1   | Nfatc3  | Traf4   |
| Adcy3         | Dnajb9   | Nsmaf   | Tspan3  |
| Ag1           | Dusp1    | Pabpc1  | Ubxn11  |
| Agpat4        | Eef1a1   | Pfkip   | Usp18   |
| Agri          | Eef2     |         | Vasp    |
| Ahnak         | Ehd1     | Plaur   | Vps13a  |
| Ap1s2         | Ehd4     | Plekho2 | Xdh     |
| Arhgap26      | Eif4b    | Pmepa1  | Xrn2    |
| Arhgap30      | Eif5a    | Ppp1r9b | Ywhae   |
| Arl2bp        | F2r      | Prf1    | Zbp1    |
| Arpc1b        | Fau      | Psap    | Zc3h6   |
| Arrdc3        | Fos      | Ptp4a1  | Zc3hav1 |
| Atf7ip        | Gbp4     | Ptp4a2  | Zswim6  |
| Atp8b4        | Ggt1     | Rab8a   |         |
| Atrn1         | H2-Q4    | Rarg    |         |
| AW112010      | H2-Q6    | Rnf157  |         |
| B4galt5       | H2afy    | Rpl10a  |         |
| Birc5         | Hipk1    | Rpl18a  |         |
| Casc4         | Hmga1    | Rpl21   |         |
| Ccdc102a      | Hspa5    | Rpl27a  |         |
| Ccdc117       | Ifih1    | Rpl30   |         |
| Cct7          | Ifit3    | Rplp2   |         |
| Cd72          | Il2rb    | Rps12   |         |
| Cd97          | Incenp   | Rras2   |         |
| Cdt1          | Irf9     | Runx3   |         |
| Celsr1        | Irs2     | Scarna2 |         |
| Cep152        | Junb     | Scpep1  |         |
| Chmp4b        | Klf11    | Sibp    |         |
| Chst11        | Klk8     | Slc16a6 |         |
| Chsy1         | Lgals1   | Slc25a4 |         |
| Clic4         | Ly9      | Sp140   |         |
| Cmah          | Mafk     | Stat1   |         |
| Cmpk2         | Map1lc3b | Stat2   |         |
| Cst7          | Mbnl1    | Synj2   |         |
| Cxcs          | Mex3a    | Tapbp1  |         |
| D4Wsu53e      | Mical1   | Thy1    |         |
| D930015E06Rik | Mtap4    | Tmem66  |         |

# Suppl. Table 1b

132 genes bound by ThPOK only, DN in all OB11 subsets

|               |          |          |         |
|---------------|----------|----------|---------|
| 1700020I14Rik | Dhx40    | Mns1     | St8sia6 |
| 2010016I18Rik | Dst      | Mthfd2   | Syt12   |
| 2610035D17Rik | Dtnb     | Nacc2    | Tbc1d30 |
| 4930481A15Rik | Eea1     | Nav2     | Tcf7    |
| Abhd14b       | Eno1     | Nbeal1   | Tecpr1  |
| Acadvl        | Epas1    | Nek4     | Tesc    |
| Actn4         | Epb4.1l1 | Npc1     | Tgfb2   |
| Acvrl1        | Exoc3    | Nrn1     | Tnfaip8 |
| Afap1         | Exoc6b   | Nrp1     | Trio    |
| Agtrap        | F2r1     | Nup153   | Ttc28   |
| Als2cl        | Fam177a  | Nxpe3    | Ttyh3   |
| App           | Fanci    | Parp3    | Vipr1   |
| Arhgap29      | Fkbp1a   | Pecam1   |         |
| Arhgef11      | Fmni3    | Polr1a   |         |
| Arsb          | Fubp1    | Ppm1j    |         |
| Atxn1         | Galnt10  | Ptms     |         |
| Aven          | Galnt6   | Ptpn13   |         |
| Axl           | Ggt5     | Ptpn6    |         |
| Bin1          | Gm4944   | Pvr      |         |
| Btg2          | Gpatch4  | Qser1    |         |
| Cacnb1        | Hadh     | Rab6b    |         |
| Ccdc109b      | Hspa1b   | Rassf3   |         |
| Cd2           | Hspbap1  | Rbm5     |         |
| Cd200         | Igfbp4   | Rcan3    |         |
| Cd4           | Ikzf2    | Rnf122   |         |
| Cd5           | Il6st    | Rnf144a  |         |
| Cd52          | Itgb3    | Rpl29    |         |
| Cecr5         | Itpr2    | Rpl34    |         |
| Chdh          | L1cam    | Rps3a    |         |
| Clec2d        | Lair1    | Rsu1     |         |
| Clip1         | Lats2    | S1pr1    |         |
| Cnn3          | Ldlr     | Sfn      |         |
| Coro7         | Lrig1    | Sft2d2   |         |
| Cpm           | Ly6c1    | Sh3bgrl3 |         |
| Cpt1a         | Macf1    | Sipa1l2  |         |
| Cyb5r4        | Mapk11   | Sit1     |         |
| Cyp2s1        | Me2      | Slc30a4  |         |
| Dapk1         | Mib2     | Slfm8    |         |
| Ddit4         | Mical3   | Snape1   |         |
| Dgkd          | Mical1   | St8sia1  |         |

286 genes bound by ThPOK only, UP in all OB11 subsets

|               |             |           |          |          |           |          |        |
|---------------|-------------|-----------|----------|----------|-----------|----------|--------|
| 2310044G17Rik | Cd274       | Fam129a   | Id2      | Mx1      | Rab11fip1 | Sifn1    | Wdct1  |
| 2410001C21Rik | Cdc20       | Fam179b   | Ifi2712a | Mx2      | Racgap1   | Sifn5    | Wipf1  |
| 2700081O15Rik | Cdc25b      | Fam73a    | Ifi47    | Myb      | Rbl2      | Sifn9    | Wipf2  |
| 8430419L09Rik | Cdk5rap1    | Fbxo32    | Igtp     | Myo1f    | Rcn1      | Smap2    | Wnt5b  |
| 9430015G10Rik | Cdk5rap2    | Fcgr3     | Ikzf3    | Nap111   | Repin1    | Sorl1    | Xaf1   |
| A230050P20Rik | Cdk6        | Ganc      | Il18r1   | Ncaph    | Rnf114    | Smchd1   | Zfp516 |
| AA465934      | Cenpb       | Gatad2a   | Ildr1    | Ncf1     | Rora      | Sorl1    | Zfp69  |
| Abcb1a        | Cep250      | Gbp10     | Ipcef1   | Ncl      | Rorc      | Srgap3   | Zfp827 |
| Acp5          | Chst15      | Gbp2      | Iqgap1   | Nkg7     | Rpl10     | Supt5h   |        |
| Acsf5         | Coro2a      | Gbp5      | Iqsec1   | Nlrc3    | Rpl11     | Syde1    |        |
| Adam11        | Csda        | Gbp6      | Irf1     | Npc2     | Rpl17     | Syf2     |        |
| Adam19        | Ctsw        | Gbp7      | Irf7     | Nrg2     | Rpl24     | Syn2     |        |
| Adar          | Cuedc2      | Gbp9      | Irgc1    | Nudc     | Rpl28     | Tagap    |        |
| Ahi1          | Cxcl10      | Gimap7    | Irgm1    | Oas3     | Rpl3      | Tapbp    |        |
| Ak3           | Cyth4       | Gilpr2    | Irgm2    | Oasl1    | Rpl31     | Tbx21    |        |
| Anp32b        | D17H6S56E-5 | Gltscr2   | Isg15    | Oasl2    | Rpl32     | Tdgf1    |        |
| Anxa2         | Ddx24       | Gm12250   | Isg20    | Orai2    | Rpl34-ps1 | Tgtp1    |        |
| Anxa6         | Ddx43       | Gm13212   | Irgb1    | Os9      | Rpl41     | Tgtp2    |        |
| Apobec3       | Ddx58       | Gm4902    | Jun      | Ostm1    | Rpl6      | Tlr12    |        |
| Arrdc4        | Ddx60       | Gpc1      | Kcna2    | Parp1    | Rps15a    | Tm6sf1   |        |
| Atp2b4        | Dhx58       | Gpr68     | Kcnc1    | Parp14   | Rps20     | Tnfaip3  |        |
| Atp6v1f       | Dnaja4      | Gramd1b   | Kcnk5    | Parp9    | Rps24     | Tnfrsf14 |        |
| Atp6v1h       | Dock5       | Gtf2i     | Kif23    | Pbxip1   | Rps26     | Tnfsf14  |        |
| Bace1         | Dpp4        | Gzmb      | Kif3c    | Pctp     | Rps27     | Top2a    |        |
| Bai2          | Dse         | H2-Oa     | Klhl6    | Pdcd6ip  | Rps29     | Tor3a    |        |
| Baiap3        | Dtx1        | H2-Ob     | Lax1     | Pde5a    | Rpsa      | Trafd1   |        |
| Baz1a         | Dtx3l       | H2-T23    | Lgals3   | Pfdn5    | Rsad2     | Trim12c  |        |
| BC006779      | Efh2        | Habp4     | Lgals3bp | Pianp    | Rtp4      | Trim25   |        |
| Bcar3         | Ehd3        | Herc6     | Limd1    | Piga     | Runx2     | Trim30a  |        |
| Bend4         | Eif1        | Hip1r     | Ltk      | Pik3ap1  | S100a10   | Trp53i11 |        |
| Bhlhe40       | Eif2ak2     | Hist1h1b  | Magohb   | Pim2     | S100a11   | Tspyl3   |        |
| Bst2          | Eif3h       | Hist1h1c  | Mast3    | Plac8    | S100a6    | Ttbk2    |        |
| C130039O16Rik | Eif3j2      | Hist1h2af | Mbd2     | Plcg2    | Sbno2     | Tulp3    |        |
| Cacna2d2      | Eml3        | Hist1h2al | Mcm3     | Plekho1  | Scamp3    | Uba7     |        |
| Camk2g        | Eml5        | Hist1h4a  | Mcm4     | Plxna1   | Scarna13  | Uba7     |        |
| Ccl5          | Eno2        | Hist1h4b  | Mcm5     | Pmaip1   | Sh3bp5    | Ubap2l   |        |
| Ccna2         | Eomes       | Hist4h4   | Mcm6     | Pml      | Shmt2     | Uhrf1    |        |
| Ccr5          | Eps8l1      | Hmgb2     | Med12    | Pole3    | Sidt1     | Usp11    |        |
| Ccr9          | Fam107b     | Hnrnpa1   | Mfap1a   | Ppp1r15a | Slc2a3    | Usp24    |        |
| Ccrn4l        | Fam111a     | Icam1     | Mki67    | Prr13    | Slc38a10  | Vcpiip1  |        |

Suppl. Table 2a

David analysis: 76 genes DN in OB11, bound by ThPOK + Runx3

| KEGG_PATHWAY | mmu04660:T cell receptor signaling pathway | 7                                                  | 3.723404 | 6.91E-04 | LAT, PTN6, PLCG1, FYN, RASGRP1, CD4, LCP2 | 83                                                             | 101 | 7691 | 6.422164 | 0.105323 |          |
|--------------|--------------------------------------------|----------------------------------------------------|----------|----------|-------------------------------------------|----------------------------------------------------------------|-----|------|----------|----------|----------|
| 97           | KEGG_PATHWAY                               | mmu04660:T cell receptor signaling pathway         | 7        | 3.723404 | 6.91E-04                                  | LAT, PTN6, PLCG1, FYN, RASGRP1, CD4, LCP2                      | 83  | 101  | 7691     | 6.422164 | 0.105323 |
| 98           | KEGG_PATHWAY                               | mmu04520:Adherens junction                         | 6        | 3.191489 | 9.75E-04                                  | PTN6, TCF7, FYN, TGFBR1, TGFB2, CTNNB1                         | 83  | 72   | 7691     | 7.721888 | 0.145284 |
| 99           | KEGG_PATHWAY                               | mmu04390:Hippo signaling pathway                   | 8        | 4.255319 | 0.001086                                  | TCF7, FRMD6, BRCC3, TGFBR1, SAV1, TGFB2, SCRIB, CTNNB1         | 83  | 151  | 7691     | 4.90928  | 0.160475 |
| 100          | KEGG_PATHWAY                               | mmu04660:Cytokine-cytokine receptor interaction    | 9        | 4.787234 | 0.004096                                  | CCR7, TNFRSF18, IL2RA, CXCR5, CCR4, TGFBR1, TGFB2, IL4RA, CD27 | 83  | 242  | 7691     | 3.446132 | 0.483603 |
| 102          | KEGG_PATHWAY                               | mmu04650:Natural killer cell mediated cytotoxicity | 6        | 3.191489 | 0.005118                                  | PRKCA, LAT, PTN6, PLCG1, FYN, LCP2                             | 83  | 105  | 7691     | 5.295009 | 0.562277 |
| 103          | KEGG_PATHWAY                               | mmu04650:Natural killer cell mediated cytotoxicity | 6        | 3.191489 | 0.005118                                  | PRKCA, LAT, PTN6, PLCG1, FYN, LCP2                             | 83  | 105  | 7691     | 5.295009 | 0.562277 |
| 104          | KEGG_PATHWAY                               | mmu04664:Fc epsilon RI signaling pathway           | 5        | 2.659574 | 0.005828                                  | PRKCA, LAT, PLCG1, FYN, LCP2                                   | 83  | 68   | 7691     | 6.81343  | 0.609757 |
| 105          | KEGG_PATHWAY                               | mmu04664:Fc epsilon RI signaling pathway           | 5        | 2.659574 | 0.005828                                  | PRKCA, LAT, PLCG1, FYN, LCP2                                   | 83  | 68   | 7691     | 6.81343  | 0.609757 |
| 106          | KEGG_PATHWAY                               | mmu04015:Rap1 signaling pathway                    | 8        | 4.255319 | 0.007609                                  | PRKCA, LAT, PLCG1, RAPGEF6, RGS14, DOCK4, LCP2, CTNNB1         | 83  | 214  | 7691     | 3.464024 | 0.707638 |
| 107          | KEGG_PATHWAY                               | mmu04640:Hematopoietic cell lineage                | 5        | 2.659574 | 0.012647                                  | IL2RA, ITGA6, IL4RA, CD2, CD4                                  | 83  | 85   | 7691     | 5.450744 | 0.871162 |
| 108          | KEGG_PATHWAY                               | mmu05210:Colorectal cancer                         | 4        | 2.12766  | 0.030557                                  | TCF7, TGFBR1, TGFB2, CTNNB1                                    | 83  | 64   | 7691     | 5.791416 | 0.993237 |
| 109          | KEGG_PATHWAY                               | mmu04919:Thyroid hormone signaling pathway         | 5        | 2.659574 | 0.033108                                  | PRKCA, ATP1B1, PLCG1, NCOA3, CTNNB1                            | 83  | 114  | 7691     | 4.064151 | 0.995575 |
| 110          | KEGG_PATHWAY                               | mmu04380:Osteoclast differentiation                | 5        | 2.659574 | 0.045176                                  | CAMK4, FYN, TGFBR1, TGFB2, LCP2                                | 83  | 126  | 7691     | 3.677089 | 0.999414 |

David analysis: 132 genes UP in OB11, bound by ThPOK + Runx3

| Category | Term             | Count                                                              | %  | PValue   | Genes    | List Total                                                                                   | Pop Hits | Pop Total | Fold Enrich |          |
|----------|------------------|--------------------------------------------------------------------|----|----------|----------|----------------------------------------------------------------------------------------------|----------|-----------|-------------|----------|
| 1        | GOTERM_BP_DIRECT | GO:006412:translation                                              | 18 | 6.896552 | 1.77E-05 | EEF1A1, RPL19, SLC25A4, RPL26, RPL27A, RPL36, EIF5A, EEF2, VARS, EIF4B, RPL30, RPS17, RPL233 | 401      | 18082     | 3.485523    |          |
| 2        | GOTERM_BP_DIRECT | GO:0098609:cell-cell adhesion                                      | 12 | 4.597701 | 3.39E-05 | COBLN1, ZC3HAV1, PFKF, EEF1G, DNAH1, STAT1, TAGLN2, CLINT1, VASP, PLEC, DXD6, EHD4           | 233      | 189       | 18082       | 4.927311 |
| 3        | GOTERM_BP_DIRECT | GO:0051607:defense response to virus                               | 10 | 3.831418 | 3.12E-04 | IFIT3, PRF1, IFIH1, ZC3HAV1, BCL2, LYST, OAS3, IFNGR1, STAT2, ZBP1                           | 233      | 167       | 18082       | 4.647015 |
| 4        | GOTERM_BP_DIRECT | GO:1901653:cellular response to peptide                            | 4  | 1.532567 | 6.84E-04 | PPP1R9B, KLFL1, KLFA, KLFB                                                                   | 233      | 14        | 18082       | 22.1729  |
| 5        | GOTERM_BP_DIRECT | GO:006414:translational elongation                                 | 5  | 1.915709 | 0.003057 | EEF1A1, RPLP2, EIF5A, EEF1G, EEF2                                                            | 233      | 47        | 18082       | 8.255867 |
| 6        | GOTERM_BP_DIRECT | GO:0034097:response to cytokine                                    | 6  | 2.298851 | 0.003869 | IL12RB2, FOS, MCL1, BCL2, STAT1, JUNB                                                        | 233      | 81        | 18082       | 5.74853  |
| 7        | GOTERM_BP_DIRECT | GO:0032458:endocytotic recycling                                   | 4  | 1.532567 | 0.003893 | EHD1, ARL4C, EHD3, EHD4                                                                      | 233      | 25        | 18082       | 12.41682 |
| 8        | GOTERM_BP_DIRECT | GO:0009615:response to virus                                       | 6  | 2.298851 | 0.00452  | IFIT3, IFIH1, NPC2, ZC3HAV1, OAS3, EEF1G                                                     | 233      | 84        | 18082       | 5.543225 |
| 9        | GOTERM_BP_DIRECT | GO:0051260:protein homooligomerization                             | 8  | 3.065134 | 0.0138   | ANXA6, PRF1, EEF1A1, CHMP4B, ITPR3, EHD1, EHD3, EHD4                                         | 233      | 197       | 18082       | 3.151478 |
| 10       | GOTERM_BP_DIRECT | GO:0051260:protein homooligomerization                             | 8  | 3.065134 | 0.0138   | ANXA6, PRF1, EEF1A1, CHMP4B, ITPR3, EHD1, EHD3, EHD4                                         | 233      | 197       | 18082       | 3.151478 |
| 11       | GOTERM_BP_DIRECT | GO:0051050:regulation of small GTPase mediated signal transduction | 3  | 1.149425 | 0.021908 | SIPALL1, RAP1GAP2, ARHGAP26                                                                  | 233      | 18        | 18082       | 12.93419 |
| 12       | GOTERM_BP_DIRECT | GO:002376:immune system process                                    | 11 | 4.214559 | 0.026465 | IFIT3, PRKCK, IFIH1, NOD1, ZC3HAV1, PIK3CD, OAS3, SLAMF7, LYS, SEMA4A, ZBP1                  | 233      | 383       | 18082       | 2.228869 |
| 13       | GOTERM_BP_DIRECT | GO:0051591:response to cAMP                                        | 4  | 1.532567 | 0.027648 | FOS, DUSP1, STAT1, JUNB                                                                      | 233      | 51        | 18082       | 6.086678 |
| 14       | GOTERM_BP_DIRECT | GO:0030036:actin cytoskeleton organization                         | 6  | 2.298851 | 0.036342 | ACTR2, PPP1R9B, TMSB10, IQSEC1, VASP, ARHGAP26                                               | 233      | 142       | 18082       | 3.279091 |
| 15       | GOTERM_BP_DIRECT | GO:0032496:response to lipopolysaccharide                          | 7  | 2.681992 | 0.041883 | IL12RB2, FOS, IL10RA, PLCG2, STAT1, JUNB, F2R                                                | 233      | 197       | 18082       | 2.757543 |

Suppl. Table 2b

DAVID analysis: 281 genes DN in OB11, bound by ThPOK only,

| Category | Term             | Count                                            | %   | PValue   | Genes    | List Total                                                                                      | Pop Hits | Pop Total | Fold Enrich |   |
|----------|------------------|--------------------------------------------------|-----|----------|----------|-------------------------------------------------------------------------------------------------|----------|-----------|-------------|---|
| 1        | GOTERM_BP_DIRECT | GO:0035556:intracellular signal transduction     | 12  | 4.33213  | 0.019527 | PRKD2, MAST4, TNS1, SP5B1, TIAM1, DGKD, PINK1, MAPK11, ARHGAP29, MYO9A, LATS2, DAPK1            | 244      | 400       | 18082       | 2 |
| 2        | GOTERM_BP_DIRECT | GO:0030335:positive regulation of cell migration | 8   | 2.888087 | 0.020154 | IGF1R, S1PR1, ACTN4, TIAM1, CSF1, F2RL1, ITGB3, THBS1                                           | 244      | 203       | 18082       | 2 |
| 3        | GOTERM_BP_DIRECT | GO:0018105:phosphorylation                       | 6   | 1.266065 | 0.033864 | PRKD2, MAST4, MYO3B, MAPKAPK3, PINK1, LATS2                                                     | 244      | 133       | 18082       | 3 |
| 4        | GOTERM_BP_DIRECT | GO:0016310:hepatoerythropoiesis                  | 15  | 5.415162 | 0.037551 | ACVRL1, MYO3B, MAPKAPK3, CASK, PINK1, MAPK11, DBERTD8E2, LATS2, DAPK1, GALK2, IGF1R, PRKD2      | 244      | 612       | 18082       | 1 |
| 5        | GOTERM_BP_DIRECT | GO:0005769:early endosome                        | 10  | 3.610108 | 0.002846 | SH3GL3, CYP17, NRP1, LDLR, ATP9A, MIB2, F2RL1, INPP5F, EEA1, RIN3                               | 256      | 226       | 19652       | 3 |
| 6        | GOTERM_BP_DIRECT | GO:0016020:membrane                              | 109 | 39.35018 | 0.014493 | DYNCL1L2, IL6ST, ZFR1, CAPZL, CASK, CDS2, VIPR1, SLC26A11, SYP, KIF13A, PTGIR, S1PR1, TIAM1, UA | 256      | 6998      | 19652       | 1 |
| 35       | KEGG_PATHWAY     | mmu04015:Rap1 signaling pathway                  | 9   | 3.249097 | 0.006544 | PRKD2, IGF1R, TIAM1, CSF1, SIPALL1, MAPK11, ITGB2, ITGB3, THBS1                                 | 101      | 214       | 7691        | 3 |
| 36       | KEGG_PATHWAY     | mmu05205:Proteoglycans in cancer                 | 7   | 2.527076 | 0.048433 | IGF1R, HIP1A, TIAM1, MAPK11, ITGB3, THBS1, ITPR2                                                | 101      | 203       | 7691        | 2 |

DAVID analysis: 432 genes UP in OB11, bound by ThPOK only,

| Category | Term             | Count                                                      | %  | PValue   | Genes    | List Total                                                                                         | Pop Hits | Pop Total | Fold Enrich |          |
|----------|------------------|------------------------------------------------------------|----|----------|----------|----------------------------------------------------------------------------------------------------|----------|-----------|-------------|----------|
| 1        | GOTERM_BP_DIRECT | GO:0009615:response to virus                               | 24 | 5.607477 | 1.43E-19 | BST2, TRX21, RPS15A, RSAD2, CDK6, PIM2, CCL5, CXCL10, ISG20, DDX58, IFIT2, OASL2, IFI272L2A, DDX60 | 387      | 84        |             |          |
| 2        | GOTERM_BP_DIRECT | GO:006412:translation                                      | 43 | 10.04673 | 1.08E-17 | RPL17, RPL36A, RBM3, EIF5, RPL15, RPL35, RPS15A, RPL38, RPS2, RPL39, RPS3, RPS26, RPS27, RPS28, RP | 387      | 401       |             |          |
| 3        | GOTERM_BP_DIRECT | GO:002376:immune system process                            | 41 | 9.579439 | 7.42E-17 | APOBEC3, HMG8B, PML, RSAD2, ISG20, B2M, NLRCS, OASL2, OASL1, ITC3, MX1, MX2, DHX58, SYK, CD7, TI   | 387      | 383       |             |          |
| 4        | GOTERM_BP_DIRECT | GO:0051607:defense response to virus                       | 27 | 6.308411 | 2.01E-15 | APOBEC3, A23005OP20RIK, RNASEL, SLFN8, PML, RSAD2, PMAIP1, CXCL10, ISG20, NLRCS, IFI502, OASL2, I  | 387      | 167       |             |          |
| 5        | GOTERM_BP_DIRECT | GO:0045071:negative regulation of viral genome replication | 13 | 3.073783 | 1.16E-12 | APOBEC3, A23005OP20RIK, RNASEL, BST2, FAM111A, RSAD2, CCL5, ISG20, ISG15, OASL1, ERF2AK2, MX2, I   | 387      | 32        |             |          |
| 6        | GOTERM_BP_DIRECT | GO:0045087:innate immune response                          | 34 | 7.943925 | 3.39E-11 | APOBEC3, HMG8B, PML, RSAD2, ISG20, B2M, NLRCS, OASL2, OASL1, ITC3, MX1, MX2, DHX58, TEC, SYK, TL   | 387      | 400       |             |          |
| 7        | GOTERM_BP_DIRECT | GO:0025458:cellular response to interferon-beta            | 9  | 2.102804 | 2.07E-06 | IRGM1, GBP6, IRGM2, IRF1, IFI47, TGT1, TGT2, GBP2, AIM2                                            | 387      | 41        |             |          |
| 8        | GOTERM_BP_DIRECT | GO:0005840:ribosome                                        | 36 | 8.411215 | 1.19E-23 | RPL17, RPL36A, RPL15, RPS15A, RPL38, RPS2, RPL39, RPS3, PRMT3, RPS26, RPS27, RPS28, RPL6, RPL31, I | 403      | 188       |             |          |
| 9        | GOTERM_BP_DIRECT | GO:0022625:cytosolic large ribosomal subunit               | 22 | 5.40187  | 1.11E-16 | RPL35A, RPL17, RPL36A, ZFP622, RPL15, RPL35, RPL23A, RPL24, RPL38, RPL39, RPL28, RPL31, RPL6, RPL  | 403      | 91        |             |          |
| 10       | GOTERM_BP_DIRECT | GO:0030529:intracellular ribonucleoprotein complex         | 33 | 7.71028  | 1.35E-13 | RPL17, RPL36A, RPL15, RPS15A, RPL38, RPS2, RPL39, RPS3, RPS26, RPS27, RPS28, RPL6, RPL31, RPLD     | 403      | 320       |             |          |
| 11       | GOTERM_BP_DIRECT | GO:0022627:cytosolic small ribosomal subunit               | 15 | 3.504673 | 2.08E-12 | RPSA, RPS15A, RPS9, RPS6, RPS4X, RPS2, RPS3, RPS26, RPS27, RPS28, RPS16, RPS13, RPS20, RPS23, RPS2 | 403      | 53        |             |          |
| 97       | KEGG_PATHWAY     | mmu03010:Ribosome                                          | 37 | 8.64486  | 9.50E-26 | RPL17, RPL36A, RPL15, RPS15A, RPL38, RPS2, RPL39, RPS3, RPS26, RPS27, RPS28, RPL6, RPL31, R        | 205      | 145       |             |          |
| 98       | KEGG_PATHWAY     | mmu05168:Herpes simplex infection                          | 19 | 4.49252  | 9.19E-06 | GLTSCR2, RNASEL, H2-M3, SDCS3, PML, TNFSF14, TNFRSF14, CCL5, H2-O6, H2-Q7, DDX58, H2-OA, JUN, IRI  | 205      | 208       |             |          |
| 99       | KEGG_PATHWAY     | mmu04612:Antigen processing and presentation               | 12 | 2.803738 | 9.40E-06 | CTSL, KLRC2, H2-OA, H2-M3, H2-O8, IFNG, H2-T22, H2-T23, H2-Q6, H2-Q7, B2M, TAPBP                   | 205      | 82        |             |          |
| 100      | KEGG_PATHWAY     | mmu04940:Type 1 diabetes mellitus                          | 10 | 2.336449 | 3.27E-05 | CPE, H2-OA, H2-M3, H2-O8, IFNG, H2-T22, H2-T23, GZMB, H2-O6, H2-Q7                                 | 205      | 62        |             |          |
| 101      | KEGG_PATHWAY     | mmu05332:Graft-versus-host disease                         | 9  | 2.102804 | 5.89E-05 | H2-OA, H2-M3, H2-O8, IFNG, H2-T22, H2-T23, GZMB, H2-O6, H2-Q7                                      | 205      | 52        |             |          |
| 102      | KEGG_PATHWAY     | mmu05330:Allograft rejection                               | 9  | 2.102804 | 1.02E-04 | H2-OA, H2-M3, H2-O8, IFNG, H2-T22, H2-T23, GZMB, H2-O6, H2-Q7                                      | 205      | 56        |             |          |
| 54       | KEGG_PATHWAY     | mmu03010:Ribosome                                          | 10 | 3.831418 | 7.88E-04 | RPL30, RPL19, RPS17, RPL21, RPL27A, RPL26, RPL36, RPLP2, FAU, RPL10A                               | 132      | 145       | 7691        | 4.018286 |
| 55       | KEGG_PATHWAY     | mmu04630:Iak-STAT signaling pathway                        | 10 | 3.831418 | 7.88E-04 | IL12RB2, IRF9, IL2RB, STAT4, IL12RB1, IL10RA, PIK3CD, STAT1, IFNGR1, STAT2                         | 132      | 145       | 7691        | 4.018286 |
| 56       | KEGG_PATHWAY     | mmu05162:Measles                                           | 9  | 3.448276 | 0.002171 | IRF9, PRKCQ, IL2RB, IFIH1, PIK3CD, OAS3, STAT1, IFNGR1, STAT2                                      | 132      | 136       | 7691        | 3.855782 |
| 57       | KEGG_PATHWAY     | mmu05168:Herpes simplex infection                          | 11 | 4.214559 | 0.002822 | IRF9, FOS, IFIH1, SRSF5, SP100, GTF2J, OAS3, STAT1, DAXX, IFNGR1, STAT2                            | 132      | 208       | 7691        | 3.08133  |
| 58       | KEGG_PATHWAY     | mmu04380:Osteoclast differentiation                        | 8  | 3.065134 | 0.005586 | IRF9, FOS, PLCG2, PIK3CD, STAT1, JUNB, IFNGR1, STAT2                                               | 132      | 126       | 7691        | 3.699375 |
| 59       | KEGG_PATHWAY     | mmu04380:Osteoclast differentiation                        | 8  | 3.065134 | 0.005586 | IRF9, FOS, PLCG2, PIK3CD, STAT1, JUNB, IFNGR1, STAT2                                               | 132      | 126       | 7691        | 3.699375 |
| 60       | KEGG_PATHWAY     | mmu05321:inflammatory bowel disease (IBD)                  | 5  | 1.915709 | 0.01778  | IL12RB2, STAT4, IL12RB1, STAT1, IFNGR1                                                             | 132      | 59        | 7691        | 4.937725 |
| 61       | KEGG_PATHWAY     | mmu05321:inflammatory bowel disease (IBD)                  | 5  | 1.915709 | 0.01778  | IL12RB2, STAT4, IL12RB1, STAT1, IFNGR1                                                             | 132      | 59        | 7691        | 4.937725 |
